# Supplementary material for: A series of four novel alkaline earth metal–organic frameworks constructed of Ca(ii), Sr(ii), Ba(ii) ions and tetrahedral MTB linker: structural diversity, stability study and low/high-pressure gas adsorption properties
Source: PubMed Central journal article supplement (PMC9056647; doi:10.1039/d0ra05145d), 2020-09-01
Supplement: RA-010-D0RA05145D-s001.pdf [file RA-010-D0RA05145D-s001.pdf]

## Supplementary information

### **A Series of Four Novel Alkaline Earth Metal-Organic Constructed of Ca(II), Sr(II), Ba(II) Ions and Tetrahedral MTB Linker: Structural Diversity, Stability Study and Low/High- Pressure Gas Adsorption Properties**

Miroslav Alması,<sup>a,\*</sup> Vladimír Zelenák,<sup>a</sup> Róbert Gyepes,<sup>b</sup> Luboš Zauška,<sup>a</sup> and Sandrine  
Bourrelly<sup>c</sup>

<sup>a</sup> *Department of Inorganic Chemistry, Faculty of Science, P. J. Šafárik University, Moyzesova  
11, SK-041 54 Košice, Slovak Republic*

<sup>b</sup> *Department of Inorganic Chemistry, Faculty of Science, Charles University, Hlavova  
2030/8 CZ-128 43 Prague, Czech Republic*

<sup>c</sup> *Aix-Marseille University, CNRS, MADIREL, F-133 97 Marseille, Cedex 20, France*

\*corresponding author: miroslav.almasi@upjs.sk

## Tables:

**Table S1** Crystal data and structure refinement summary for prepared AE-MOFs.

| Compound                                             | UPJS-6                                                          | UPJS-7                                                            | UPJS-8                                                            | UPJS-9                                                            |
|------------------------------------------------------|-----------------------------------------------------------------|-------------------------------------------------------------------|-------------------------------------------------------------------|-------------------------------------------------------------------|
| Empirical formula                                    | C <sub>58</sub> H <sub>32</sub> O <sub>16</sub> Ca <sub>4</sub> | C <sub>43,5</sub> H <sub>32</sub> O <sub>17</sub> Ca <sub>4</sub> | C <sub>43,5</sub> H <sub>24</sub> O <sub>12</sub> Sr <sub>3</sub> | C <sub>43,5</sub> H <sub>36</sub> O <sub>18</sub> Ba <sub>3</sub> |
| Molar mass (g.mol <sup>-1</sup> )                    | 1145.18                                                         | 987.03                                                            | 1247.7                                                            | 1396.85                                                           |
| Temperature (K)                                      | 150(2)                                                          | 120(2)                                                            | 150(2)                                                            | 150(2)                                                            |
| Wavelength (nm)                                      | 0.71073                                                         | 1.54178                                                           | 0.71073                                                           | 0.71073                                                           |
| Crystal size (mm)                                    | 0.47 x 0.44 x 0.30                                              | 0.74 x 0.3 x 0.28                                                 | 0.41 x 0.16 x 0.10                                                | 0.30 x 0.16 x 0.13                                                |
| Crystal shape                                        | prism                                                           | prism                                                             | bar                                                               | prism                                                             |
| Crystal colour                                       | colourless                                                      | colourless                                                        | colourless                                                        | colourless                                                        |
| Crystallographic system                              | orthorhombic                                                    | tetragonal                                                        | monoclinic                                                        | monoclinic                                                        |
| Space group                                          | <i>Pca</i> 2 <sub>1</sub>                                       | <i>I4/m</i>                                                       | <i>P2</i> <sub>1</sub> / <i>n</i>                                 | <i>C2/c</i>                                                       |
| <i>a</i> (Å)                                         | 12.4203(6)                                                      | 13.7591(6)                                                        | 15.6159(6)                                                        | 30.7615(16)                                                       |
| <i>b</i> (Å)                                         | 22.3330(8)                                                      | 13.7591(6)                                                        | 21.5936(8)                                                        | 11.9378(6)                                                        |
| <i>c</i> (Å)                                         | 28.0820(12)                                                     | 24.7686(15)                                                       | 28.5465(10)                                                       | 25.851(2)                                                         |
| $\beta$ (°)                                          | 90                                                              | 90                                                                | 102.488(1)                                                        | 122.448(1)                                                        |
| Cell volume <i>V</i> <sub>c</sub> (Å <sup>3</sup> )  | 7789.5(6)                                                       | 4689.0(5)                                                         | 9398.2(2)                                                         | 8011.0(9)                                                         |
| <i>Z</i>                                             | 4                                                               | 4                                                                 | 4                                                                 | 4                                                                 |
| Density (g.cm <sup>-3</sup> )                        | 0.976                                                           | 0.845                                                             | 0.882                                                             | 1.158                                                             |
| Diffractometer                                       | Nonius KappaCCD                                                 | Bruker D8 VENTURE                                                 | Nonius KappaCCD                                                   | Nonius KappaCCD                                                   |
| Theta range $\theta$ (°)                             | 2.4 ÷ 25.2                                                      | 4.5 ÷ 57.4                                                        | 1.2 ÷ 24.0                                                        | 1.6 ÷ 27.5                                                        |
| Reflections measured                                 | 66563                                                           | 15827                                                             | 41788                                                             | 27824                                                             |
| Independent reflections ( <i>I</i> ≥ 2σ( <i>I</i> )) | 9687                                                            | 1830                                                              | 9654                                                              | 6620                                                              |
| Absorption coefficient $\mu$ (mm <sup>-1</sup> )     | 0.33                                                            | 2.41                                                              | 1.74                                                              | 1.51                                                              |
| <i>F</i> (000)                                       | 2352                                                            | 1224                                                              | 2488                                                              | 2704                                                              |
| Limiting indices <i>h</i>                            | -15 ÷ 15                                                        | -16 ÷ 15                                                          | -17 ÷ 17                                                          | -39 ÷ 39                                                          |
| Limiting indices <i>k</i>                            | -27 ÷ 26                                                        | -16 ÷ 16                                                          | -24 ÷ 20                                                          | -15 ÷ 14                                                          |
| Limiting indices <i>l</i>                            | -34 ÷ 34                                                        | -22 ÷ 29                                                          | -32 ÷ 26                                                          | -33 ÷ 33                                                          |
| Parameters                                           | 704                                                             | 103                                                               | 704                                                               | 352                                                               |
| Goof                                                 | 1.000                                                           | 1.059                                                             | 1.030                                                             | 1.048                                                             |
| <i>R</i> <sub>1</sub> (obs.)                         | 0.057                                                           | 0.121                                                             | 0.065                                                             | 0.039                                                             |
| <i>wR</i> <sub>2</sub> (obs.)                        | 0.162                                                           | 0.409                                                             | 0.163                                                             | 0.090                                                             |

**Table S2** Selected bond lengths (Å) and angles (°) in the crystal structure of compound  $\{[\text{Ca}_4(\mu_8\text{-MTB})_2] \cdot 2\text{DMF} \cdot 4\text{H}_2\text{O}\}_n$  (UPJS-6).

| <i>Bond lengths (Å)</i> |           |         |           |
|-------------------------|-----------|---------|-----------|
| Ca1–O5                  | 2.290 (4) | Ca1–O10 | 2.381 (4) |
| Ca1–O8                  | 2.264 (4) | Ca1–O13 | 2.311 (4) |
| Ca1–O10                 | 2.381 (4) | Ca3–O9  | 2.338 (3) |
| Ca1–O13                 | 2.311 (4) | Ca3–O11 | 2.339 (3) |
| Ca1–O15                 | 2.285 (3) | Ca4–O1  | 2.512 (4) |
| Ca2–O3 <sup>iii</sup>   | 2.387 (4) | Ca4–O2  | 2.450 (5) |

|                       |           |         |             |
|-----------------------|-----------|---------|-------------|
| Ca2–O7 <sup>i</sup>   | 2.326 (4) | Ca4–O5  | 2.515 (4)   |
| Ca2–O11 <sup>ii</sup> | 2.568 (4) | Ca4–O6  | 2.457 (4)   |
| Ca2–O12 <sup>ii</sup> | 2.447 (4) | Ca4–O9  | 2.702 (3)   |
| Ca2–O13               | 2.529 (4) | Ca4–O10 | 2.490 (3)   |
| Ca2–O14               | 2.425 (4) | Ca4–O16 | 2.339 (3)   |
| Ca3–O1                | 2.305 (4) | Ca4–Ca1 | 3.7481 (16) |
| Ca3–O4                | 2.305 (4) | Ca1–Ca2 | 4.1509 (17) |
| Ca1–O5                | 2.290 (4) | Ca3–Ca4 | 3.8746 (16) |
| Ca1–O8                | 2.264 (4) |         |             |

***Bond angles (°)***

|                                          |             |             |             |
|------------------------------------------|-------------|-------------|-------------|
| O5–Ca1–O8                                | 92.71 (14)  | O1–Ca3–O9   | 76.08 (13)  |
| O5–Ca1–O10                               | 74.28 (13)  | O1–Ca3–O11  | 173.89 (15) |
| O5–Ca1–O13                               | 167.05 (15) | O4–Ca3–O9   | 169.42 (14) |
| O5–Ca1–O15                               | 90.24 (14)  | O4–Ca3–O11  | 79.56 (14)  |
| O8–Ca1–O10                               | 166.06 (13) | O9–Ca3–O11  | 109.06 (13) |
| O8–Ca1–O13                               | 81.33 (14)  | O1–Ca4–O2   | 50.70 (15)  |
| O8–Ca1–O15                               | 94.39 (14)  | O1–Ca4–O5   | 156.07 (12) |
| O10–Ca1–O13                              | 112.42 (13) | O1–Ca4–O6   | 121.88 (12) |
| O10–Ca1–O15                              | 80.92 (13)  | O1–Ca4–O9   | 66.45 (11)  |
| O13–Ca1–O15                              | 101.62 (13) | O1–Ca4–O10  | 113.03 (13) |
| O3 <sup>iii</sup> –Ca2–O7 <sup>i</sup>   | 92.65 (12)  | O1–Ca4–O16  | 105.89 (15) |
| O3 <sup>iii</sup> –Ca2–O11 <sup>ii</sup> | 92.92 (13)  | O2–Ca4–O5   | 126.16 (16) |
| O3 <sup>iii</sup> –Ca2–O12 <sup>ii</sup> | 143.36 (14) | O2–Ca4–O6   | 74.34 (13)  |
| O3 <sup>iii</sup> –Ca2–O13               | 84.74 (13)  | O2–Ca4–O9   | 114.13 (15) |
| O3 <sup>iii</sup> –Ca2–O14               | 138.02 (14) | O2–Ca4–O10  | 163.71 (15) |
| O7 <sup>i</sup> –Ca2–O11 <sup>ii</sup>   | 95.03 (13)  | O2–Ca4–O16  | 99.11 (18)  |
| O7 <sup>i</sup> –Ca2–O12 <sup>ii</sup>   | 101.30 (17) | O5–Ca4–O6   | 52.65 (12)  |
| O7 <sup>i</sup> –Ca2–O13                 | 97.31 (13)  | O5–Ca4–O9   | 119.12 (12) |
| O7 <sup>i</sup> –Ca2–O14                 | 93.87 (16)  | O5–Ca4–O10  | 68.61 (12)  |
| O11 <sup>ii</sup> –Ca2–O12 <sup>ii</sup> | 52.53 (12)  | O5–Ca4–O16  | 98.04 (14)  |
| O11 <sup>ii</sup> –Ca2–O13               | 167.54 (13) | O6–Ca4–O10  | 121.14 (12) |
| O11 <sup>ii</sup> –Ca2–O14               | 127.62 (12) | O6–Ca4–O16  | 99.24 (15)  |
| O12 <sup>ii</sup> –Ca2–O13               | 126.00 (12) | O9–Ca4–O6   | 171.48 (12) |
| O12 <sup>ii</sup> –Ca2–O14               | 75.11 (12)  | O9–Ca4–O10  | 50.53 (8)   |
| O13–Ca2–O14                              | 53.30 (12)  | O9–Ca4–O16  | 79.00 (11)  |
| O1–Ca3–O4                                | 95.71 (15)  | O10–Ca4–O16 | 84.06 (12)  |

---

Symmetry operations: (i) 1–x, –y, –1/2+z; (ii) –1/2+x, 1–y, –1+z; (iii) –x, –y, –1/2+z.

**Table S3** Selected bond lengths (Å) and angles (°) in the crystal structure of compound  $\{[\text{Ca}_4(\mu_4\text{-O})(\mu_8\text{-MTB})_{3/2}(\text{H}_2\text{O})_4]\cdot 4\text{DMF}\cdot 4\text{H}_2\text{O}\}_n$  (**UPJS-7**).

| <b>Bond lengths (Å)</b>               |             |                                        |             |
|---------------------------------------|-------------|----------------------------------------|-------------|
| Ca–O1                                 | 2.685 (3)   | Ca–O4                                  | 2.274 (9)   |
| Ca–O2                                 | 2.320 (4)   | Ca–O2 <sup>ii</sup>                    | 2.626 (4)   |
| Ca–O3                                 | 2.387 (4)   | Ca–Ca <sup>iv</sup>                    | 3.797 (4)   |
| <b>Bond angles (°)</b>                |             |                                        |             |
| O1–Ca–O2 <sup>iii</sup>               | 68.67 (11)  | O2 <sup>ii</sup> –Ca–O3                | 52.14 (14)  |
| O1–Ca–O2 <sup>ii</sup>                | 64.61 (10)  | O2 <sup>ii</sup> –Ca–O2 <sup>iii</sup> | 69.51 (17)  |
| O1–Ca–O3 <sup>i</sup>                 | 114.28 (13) | O2 <sup>ii</sup> –Ca–O3 <sup>i</sup>   | 104.07 (15) |
| O1–Ca–O4                              | 147.5 (2)   | O2–Ca–O4 <sup>i</sup>                  | 86.9 (2)    |
| O2 <sup>iii</sup> –Ca–O2 <sup>i</sup> | 80.4 (2)    | O2–Ca–O4 <sup>iii</sup>                | 137.60 (16) |
| O2–Ca–O2 <sup>ii</sup>                | 133.1 (2)   | O3–Ca–O3 <sup>i</sup>                  | 97.4 (2)    |
| O2 <sup>ii</sup> –Ca–O2 <sup>i</sup>  | 86.97 (19)  | O3 <sup>i</sup> –Ca–O4                 | 86.0 (2)    |
| O2 <sup>i</sup> –Ca–O3 <sup>i</sup>   | 168.84 (16) | Ca <sup>v</sup> –O2–Ca                 | 90.0        |
| O2 <sup>i</sup> –Ca–O3                | 90.64 (14)  | Ca <sup>iv</sup> –Ca–Ca <sup>v</sup>   | 90.0        |

Symmetry operations: (i) x, y, 2–z; (ii) –x, y, 2–z; (iii) –x, y, z; (iv) –x, y, z; (v) x, –y, z.

**Table S4** Selected bond lengths (Å) and angles (°) in the crystal structure of compound  $\{[\text{Sr}_3(\mu_7\text{-MTB})_{3/2}]\cdot 4\text{DMF}\cdot 7\text{H}_2\text{O}\}_n$  (**UPJS-8**).

| <b>Bond lengths (Å)</b> |             |             |             |
|-------------------------|-------------|-------------|-------------|
| Sr1–O1                  | 2.667 (5)   | Sr3–O3      | 2.671 (5)   |
| Sr1–O2                  | 2.707 (3)   | Sr2–O10     | 2.648 (3)   |
| Sr1–O6                  | 2.627 (4)   | Sr2–O11     | 2.603 (6)   |
| Sr1–O7                  | 2.625 (3)   | Sr2–O14     | 2.673 (3)   |
| Sr1–O13                 | 2.607 (5)   | Sr2–O15     | 2.583 (4)   |
| Sr1–O14                 | 2.469 (3)   | Sr3–O1      | 2.644 (2)   |
| Sr1–O16                 | 2.431 (4)   | Sr3–O2      | 2.802 (3)   |
| Sr2–O1                  | 2.615 (2)   | Sr3–O4      | 2.605 (3)   |
| Sr2–O2                  | 2.573 (3)   | Sr3–O5      | 2.588 (4)   |
| Sr2–O3                  | 2.497 (5)   | Sr3–O6      | 2.485 (2)   |
| <b>Bond angles (°)</b>  |             |             |             |
| O1–Sr1–O6               | 72.40 (10)  | O10–Sr2–O11 | 49.23 (10)  |
| O1–Sr1–O7               | 103.21 (12) | O10–Sr2–O15 | 85.66 (11)  |
| O1–Sr1–O13              | 49.06 (10)  | O11–Sr2–O15 | 88.23 (11)  |
| O1–Sr1–O14              | 74.41 (11)  | O14–Sr2–O10 | 79.38 (10)  |
| O1–Sr1–O16              | 146.88 (11) | O14–Sr2–O11 | 117.57 (10) |
| O2–Sr1–O1               | 62.64 (9)   | O14–Sr2–O15 | 50.08 (10)  |

|             |             |             |             |
|-------------|-------------|-------------|-------------|
| O2–Sr1–O6   | 72.86 (9)   | O2–Sr2–O3   | 81.33 (10)  |
| O2–Sr1–O7   | 121.97 (11) | O2–Sr2–O10  | 142.10 (10) |
| O2–Sr1–O13  | 111.69 (10) | O2–Sr2–O11  | 168.52 (10) |
| O2–Sr1–O14  | 70.76 (10)  | O2–Sr2–O14  | 69.83 (10)  |
| O2–Sr1–O16  | 85.71 (11)  | O2–Sr2–O15  | 90.90 (10)  |
| O6–Sr1–O7   | 50.07 (10)  | O3–Sr2–O10  | 111.95 (11) |
| O6–Sr1–O13  | 87.20 (13)  | O3–Sr2–O11  | 95.66 (11)  |
| O6–Sr1–O14  | 138.94 (10) | O1–Sr3–O2   | 61.65 (9)   |
| O6–Sr1–O16  | 89.91 (12)  | O1–Sr3–O3   | 68.43 (9)   |
| O7–Sr1–O13  | 78.71 (14)  | O1–Sr3–O4   | 115.76 (11) |
| O7–Sr1–O14  | 164.83 (12) | O1–Sr3–O5   | 110.26 (11) |
| O7–Sr1–O16  | 84.69 (14)  | O1–Sr3–O6   | 75.04 (10)  |
| O13–Sr1–O14 | 88.97 (13)  | O2–Sr3–O3   | 74.22 (9)   |
| O13–Sr1–O16 | 160.53 (13) | O2–Sr3–O4   | 110.16 (11) |
| O14–Sr1–O16 | 105.60 (13) | O2–Sr3–O5   | 48.61 (10)  |
| O1–Sr2–O2   | 65.17 (9)   | O2–Sr3–O6   | 73.36 (9)   |
| O1–Sr2–O3   | 71.52 (10)  | O3–Sr3–O4   | 50.08 (10)  |
| O1–Sr2–O10  | 84.96 (10)  | O3–Sr3–O5   | 91.84 (10)  |
| O1–Sr2–O11  | 124.51 (10) | O3–Sr3–O6   | 139.45 (10) |
| O1–Sr2–O14  | 72.03 (10)  | O4–Sr3–O5   | 90.30 (13)  |
| O1–Sr2–O15  | 122.10 (10) | O4–Sr3–O6   | 169.15 (12) |
| O3–Sr2–O14  | 140.46 (10) | O5–Sr3–O6   | 84.59 (11)  |
| O3–Sr2–O15  | 159.63 (11) | Sr2–Sr3–Sr1 | 60.155 (12) |

**Table S5** Selected bond lengths (Å) and angles (°) in the crystal structure of compound  $\{[\text{Ba}_3(\mu_7\text{-MTB})_{3/2}(\text{H}_2\text{O})_6]\cdot 2\text{DMF}\cdot 4\text{H}_2\text{O}\}_n$  (**UPJS-9**).

| <i>Bond lengths (Å)</i> |           |         |            |
|-------------------------|-----------|---------|------------|
| Ba1–O1                  | 2.740 (3) | Ba2–O11 | 2.807 (3)  |
| Ba1–O4                  | 2.671 (3) | Ba2–O13 | 2.849 (5)  |
| Ba1–O5                  | 2.700 (2) | Ba1–Ba2 | 4.4208 (4) |
| Ba2–O1                  | 2.850 (3) | C1–O1   | 1.257 (4)  |
| Ba2–O2                  | 2.833 (3) | C1–O2   | 1.256 (5)  |
| Ba2–O3                  | 2.693 (4) | C13–O3  | 1.245 (6)  |
| Ba2–O5                  | 2.848 (3) | C13–O4  | 1.250 (6)  |
| Ba2–O6                  | 2.871 (2) | C20–O5  | 1.256 (5)  |
| Ba2–O7                  | 2.908 (3) | C20–O6  | 1.257 (5)  |
| Ba2–O10                 | 2.812 (2) |         |            |
| <i>Bond angles (°)</i>  |           |         |            |

|                        |             |                          |              |
|------------------------|-------------|--------------------------|--------------|
| O1–Ba1–O1 <sup>i</sup> | 146.76 (14) | O2–Ba2–O13               | 85.72 (17)   |
| O1–Ba1–O4              | 69.56 (11)  | O3–Ba2–O5                | 89.27 (10)   |
| O1–Ba1–O4 <sup>i</sup> | 141.90 (10) | O3–Ba2–O6                | 92.07 (10)   |
| O1–Ba1–O5              | 72.90 (8)   | O3–Ba2–O7                | 143.28 (12)  |
| O1–Ba1–O5 <sup>i</sup> | 111.92 (8)  | O3–Ba2–O10               | 78.62 (11)   |
| O4–Ba1–O4 <sup>i</sup> | 80.14 (17)  | O3–Ba2–O11               | 123.82 (11)  |
| O4–Ba1–O5              | 85.41 (11)  | O3–Ba2–O13               | 146.31 (14)  |
| O4–Ba1–O5 <sup>i</sup> | 82.41 (11)  | O5–Ba2–O6                | 45.34 (8)    |
| O5–Ba1–O5 <sup>i</sup> | 164.07 (15) | O5–Ba2–O7                | 92.91 (9)    |
| O1–Ba2–O2              | 45.84 (8)   | O5–Ba2–O10               | 116.59 (9)   |
| O1–Ba2–O3              | 76.61 (11)  | O5–Ba2–O11               | 146.65 (11)  |
| O1–Ba2–O5              | 69.12 (8)   | O5–Ba2–O13               | 74.41 (15)   |
| O1–Ba2–O6              | 113.78 (7)  | O6–Ba2–O7                | 64.91 (9)    |
| O1–Ba2–O7              | 137.77 (11) | O6–Ba2–O10               | 72.88 (9)    |
| O1–Ba2–O10             | 154.52 (10) | O6–Ba2–O11               | 127.49 (10)  |
| O1–Ba2–O11             | 111.26 (11) | O6–Ba2–O13               | 96.51 (16)   |
| O1–Ba2–O13             | 70,10 (14)  | O7–Ba2–O10               | 67.70 (11)   |
| O2–Ba2–O3              | 74.54 (12)  | O7–Ba2–O11               | 63.84 (11)   |
| O2–Ba2–O5              | 114.85 (8)  | O7–Ba2–O13               | 68.29 (15)   |
| O2–Ba2–O6              | 157.25 (8)  | O10–Ba2–O11              | 78.09 (12)   |
| O2–Ba2–O7              | 135.48 (10) | O10–Ba2–O13              | 135.01 (14)  |
| O2–Ba2–O10             | 120.70 (9)  | O11–Ba2–O13              | 74.76 (15)   |
| O2–Ba2–O11             | 75.00 (11)  | Ba2–Ba1–Ba2 <sup>i</sup> | 165.579 (13) |

---

Symmetry operations: (i)  $-x, y, 1/2-z$ .

## Figures:

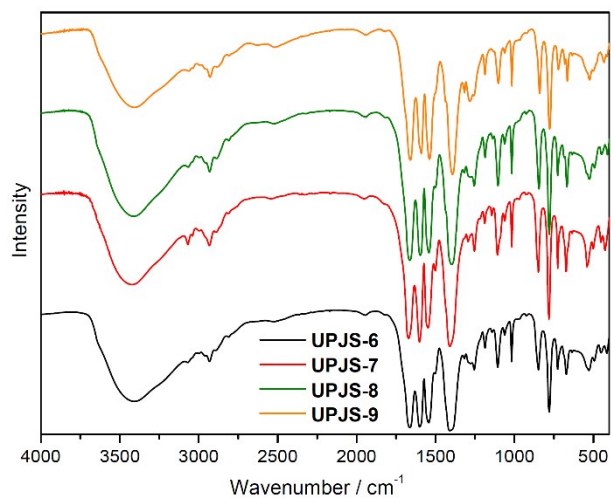

**Fig. S1** Infrared spectra of prepared compounds.

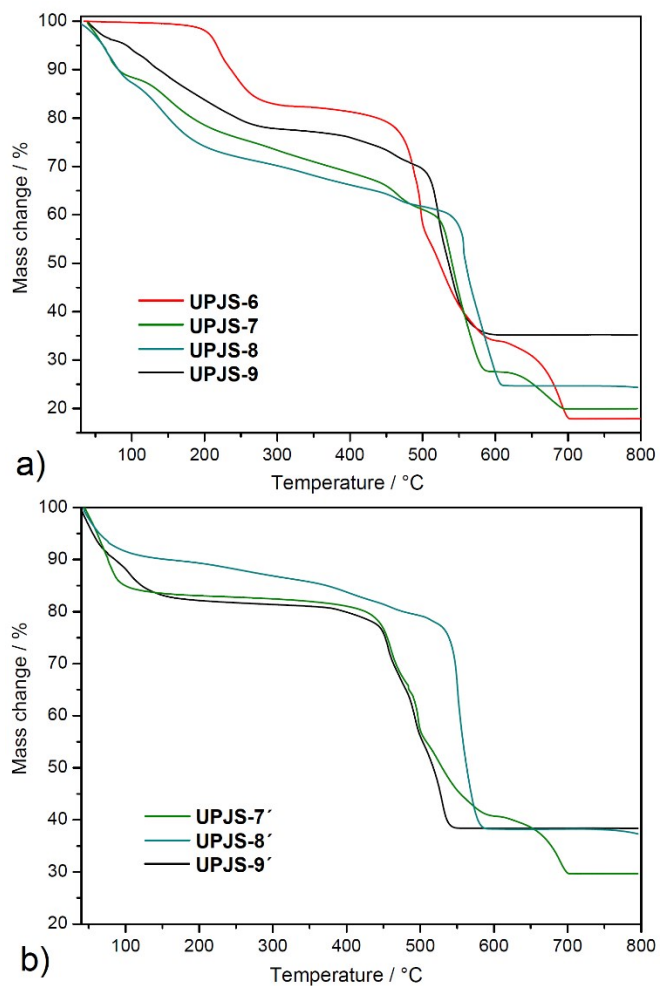

**Fig. S2** TG analytical curves of a) as-synthesized samples and b) ethanol-exchanged materials.

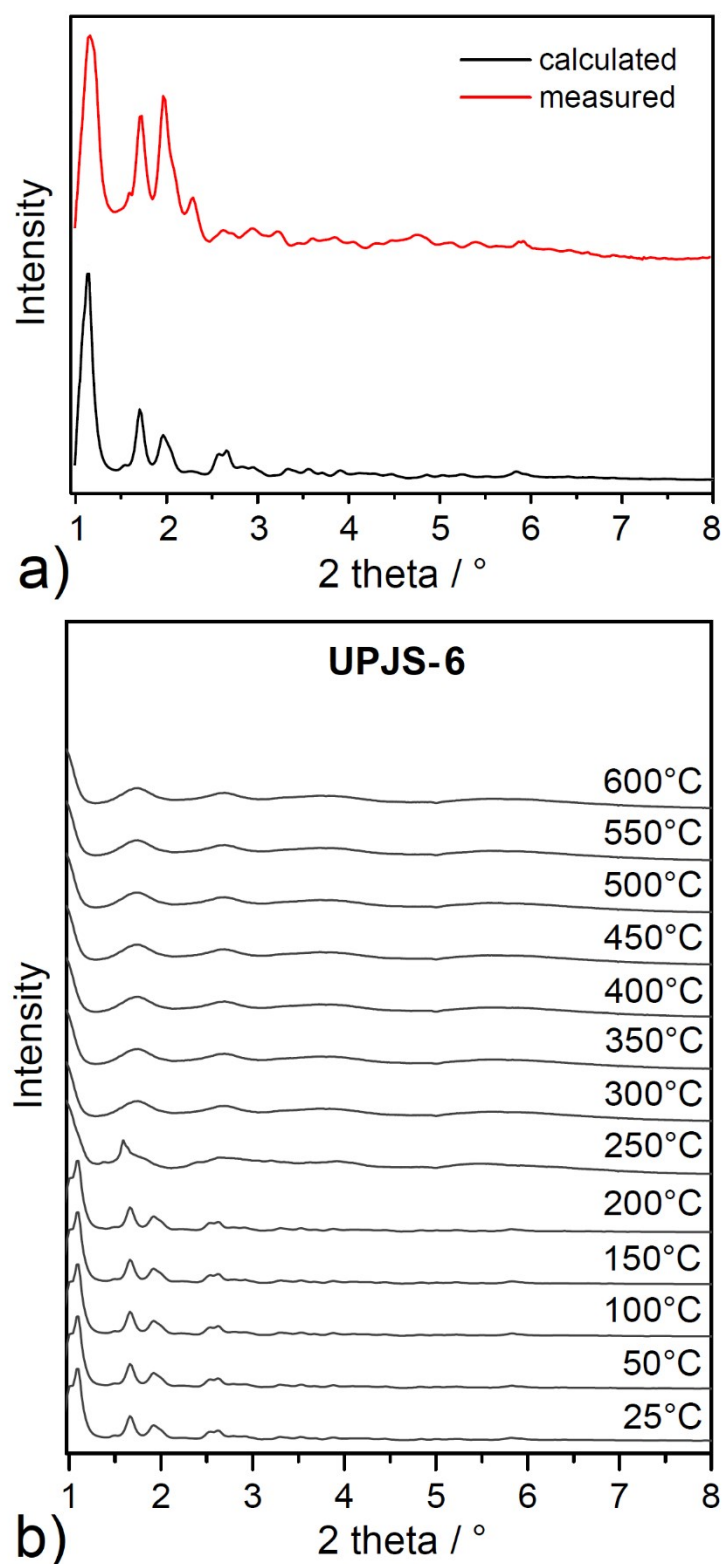

**Fig. S3** a) The comparison of measured HE-PXRD pattern of as synthesized sample (red line) and the pattern calculated from single X-ray diffraction data (black line). b) HE-PXRD patterns of compound UPJS-6 measured during *in-situ* heating in a temperature range of 25-600°C with 50°C step and  $2\theta$  range 0.9-8° in an atmosphere of argon.



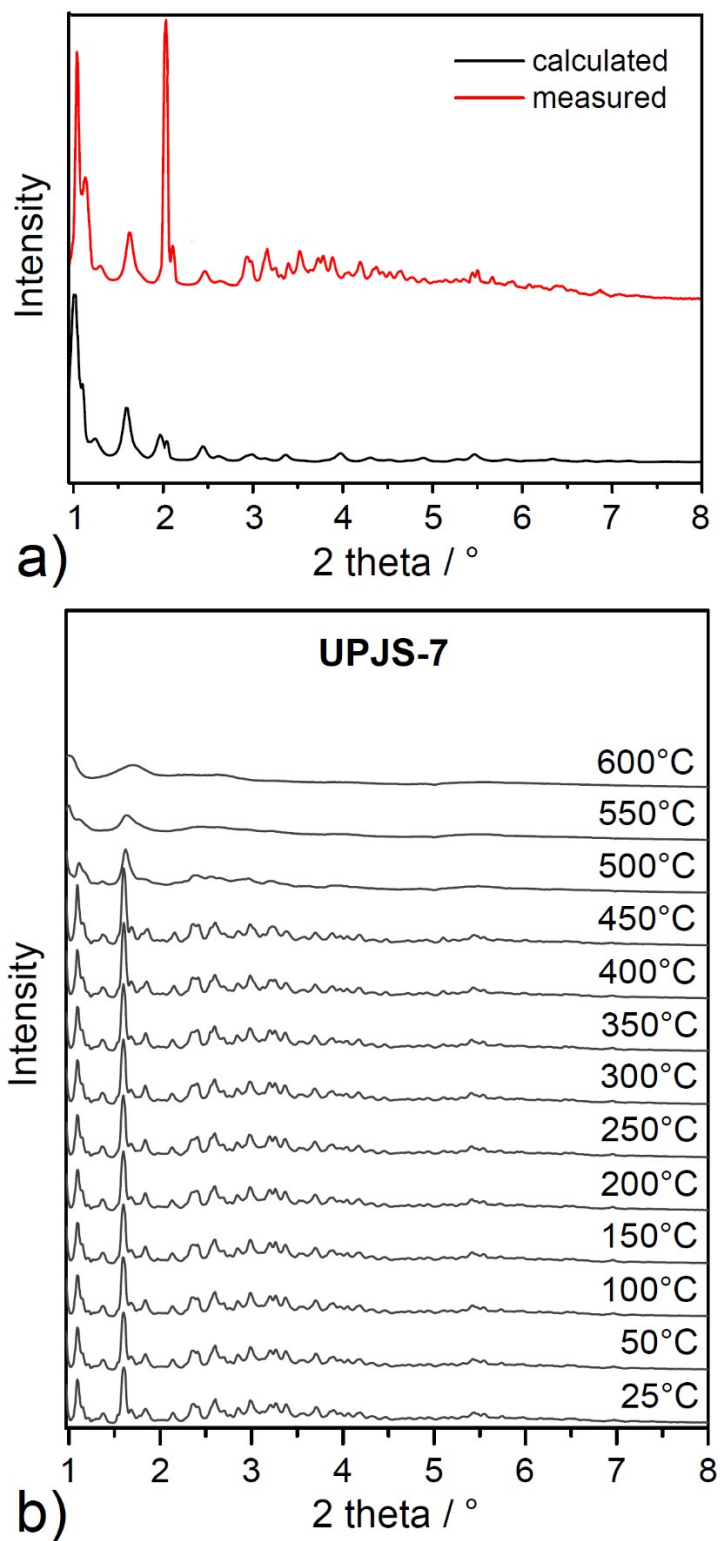

**Fig. S4** a) The comparison of measured HE-PXRD pattern of as synthesized sample (red line) and pattern calculated from single X-ray diffraction data (black line). b) HE-PXRD patterns of compound **UPJS-7** measured during *in-situ* heating in a temperature range of 25-600°C with 50°C step and  $2\theta$  range 0.9-8° in an atmosphere of argon.

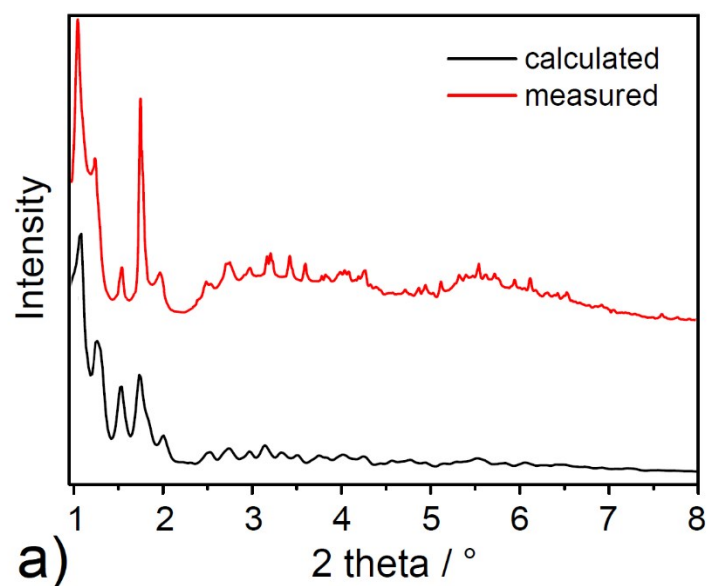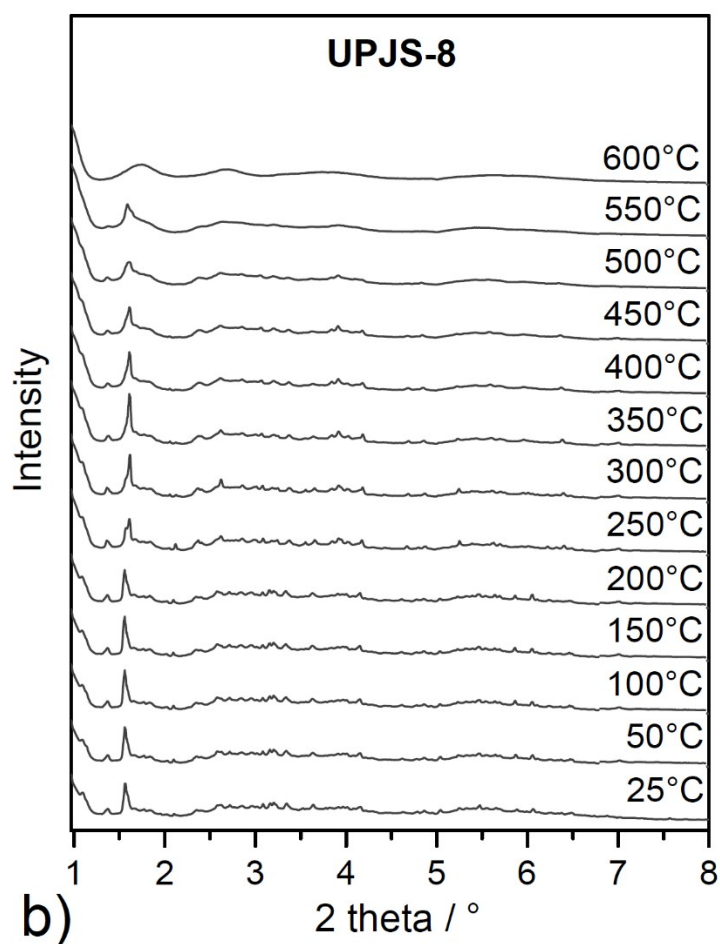

**Fig. S5** a) The comparison of measured HE-PXRD pattern of as synthesized sample (red line) and the pattern calculated from single X-ray diffraction data (black line). b) HE-PXRD patterns of compound **UPJS-8** measured during *in-situ* heating in a temperature range of 25-600°C with 50°C step and  $2\theta$  range 0.9-8° in an atmosphere of argon.

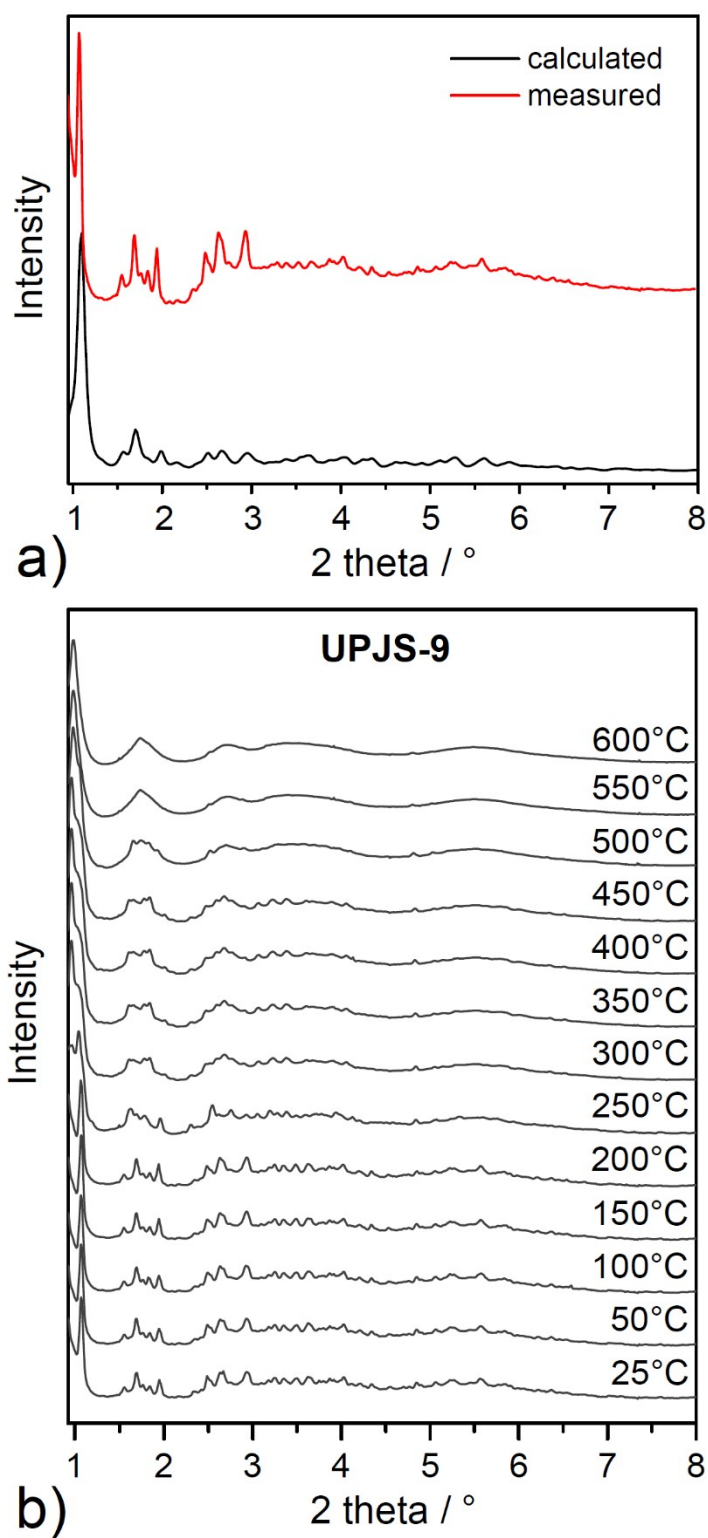

**Fig. S6** a) The comparison of measured HE-PXRD pattern of as synthesized sample (red line) and the pattern calculated from single X-ray diffraction data (black line). b) HE-PXRD patterns of compound **UPJS-9** measured during *in-situ* heating in a temperature range of 25-600°C with 50°C step and  $2\theta$  range 0.9-8° in an atmosphere of argon.

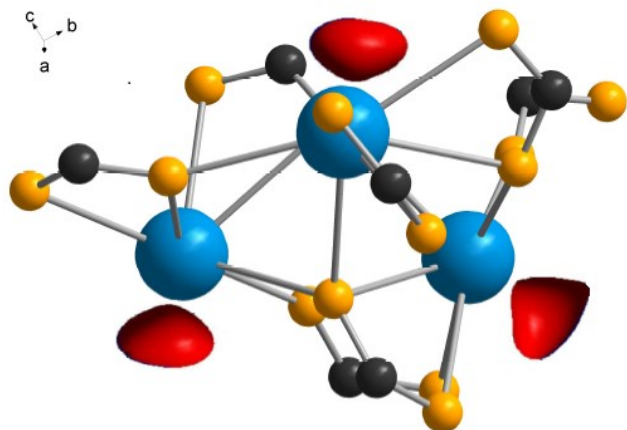

**Fig. S7** A view of unoccupied orbitals (red colour) located on strontium ions in compound **UPJS-8**.
